# Supplementary material for: Observations of the vertical distributions of summertime atmospheric pollutants in Nam Co: OH production and source analysis
Source: Copernicus journal article supplement (doi:10.5194/egusphere-2024-461), 2024-03-15
Supplement: Supplementary file 1 [file egusphere-2024-461-supplement.pdf]

1 *Supplyment*

2 Observations of the vertical distributions of summertime  
3 atmospheric pollutants in Nam Co: OH production and source  
4 analysis

5 Chengzhi Xing<sup>1</sup>, Cheng Liu<sup>2,1,3,5,\*</sup>, Chunxiang Ye<sup>4,\*</sup>, Xiangguang Ji<sup>7</sup>, Jingkai Xue<sup>6</sup>, Jinping  
6 Ou<sup>1</sup>, Hongyu Wu<sup>6</sup>, and Qihou Hu<sup>1</sup>

7  
8 <sup>1</sup> Key Lab of Environmental Optics & Technology, Anhui Institute of Optics and Fine Mechanics, Hefei Institutes  
9 of Physical Science, Chinese Academy of Sciences, Hefei, 230031, China

10 <sup>2</sup> Department of Precision Machinery and Precision Instrumentation, University of Science and Technology of  
11 China, Hefei, 230026, China

12 <sup>3</sup> Center for Excellence in Regional Atmospheric Environment, Institute of Urban Environment, Chinese Academy  
13 of Sciences, Xiamen, 361021, China

14 <sup>4</sup> College of Environmental Sciences and Engineering, Peking University, 100871 Beijing

15 <sup>5</sup> Key Laboratory of Precision Scientific Instrumentation of Anhui Higher Education Institutes, University of  
16 Science and Technology of China, Hefei, 230026, China

17 <sup>6</sup> School of Environmental Science and Optoelectronic Technology, University of Science and Technology of  
18 China, Hefei, 230026, China

19 <sup>7</sup> Institute of Physical Science and Information Technology, Anhui University, Hefei, 230601, China

20  
21 \*Corresponding author. E-mail: chliu81@ustc.edu.cn; c.ye@pku.edu.cn

22

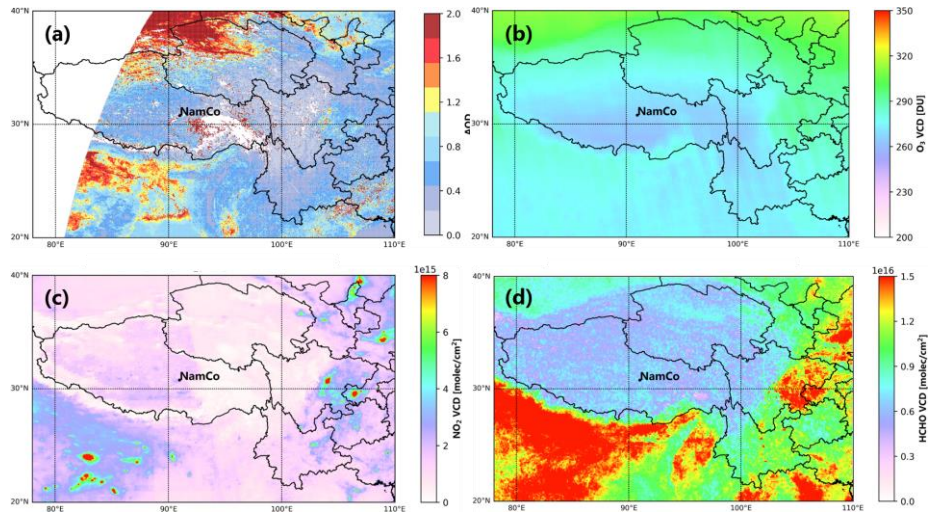

24

25

26

27

28

Figure S1. Averaged spatial distributions of (a) AOD monitored by Himawari-8, (b) O<sub>3</sub> total VCDs monitored by OMI, (c) NO<sub>2</sub> VCDs monitored by TROPOMI, and (d) HCHO VCDs monitored by TROPOMI from May to July 2019.

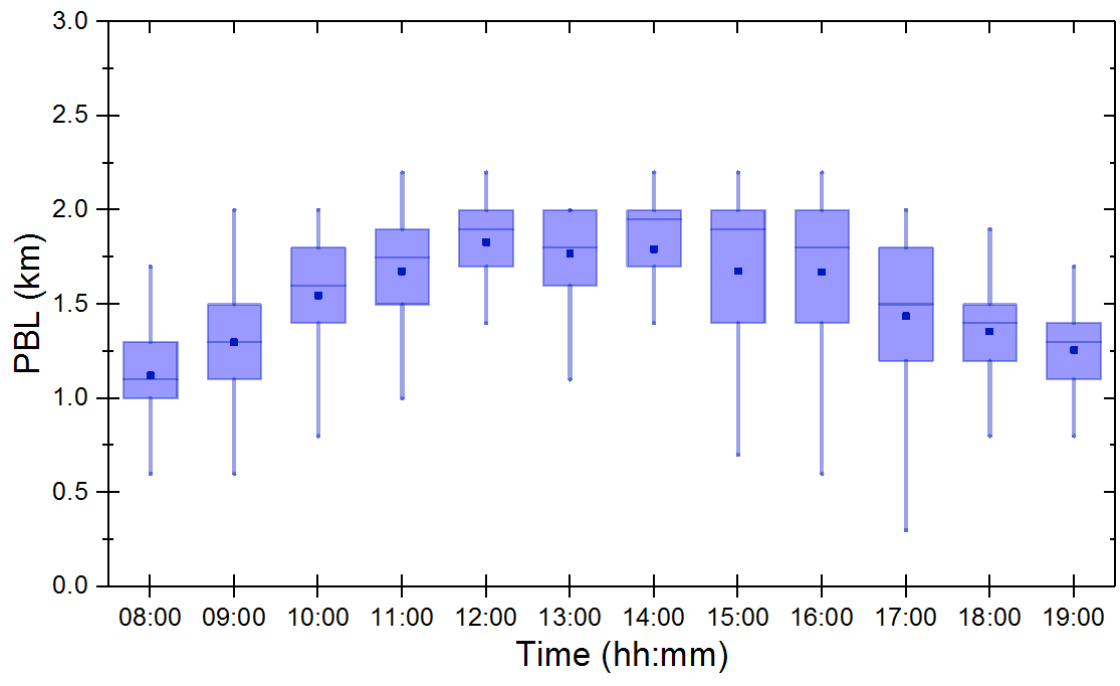

29

30

31

32

33

Figure S2. The diurnal variation of PBL in Nam Co from May to July 2019. The top and bottom of the box represented 75<sup>th</sup> and 25<sup>th</sup> percentiles, respectively. The lines and dots within the boxes were the median and mean, respectively.

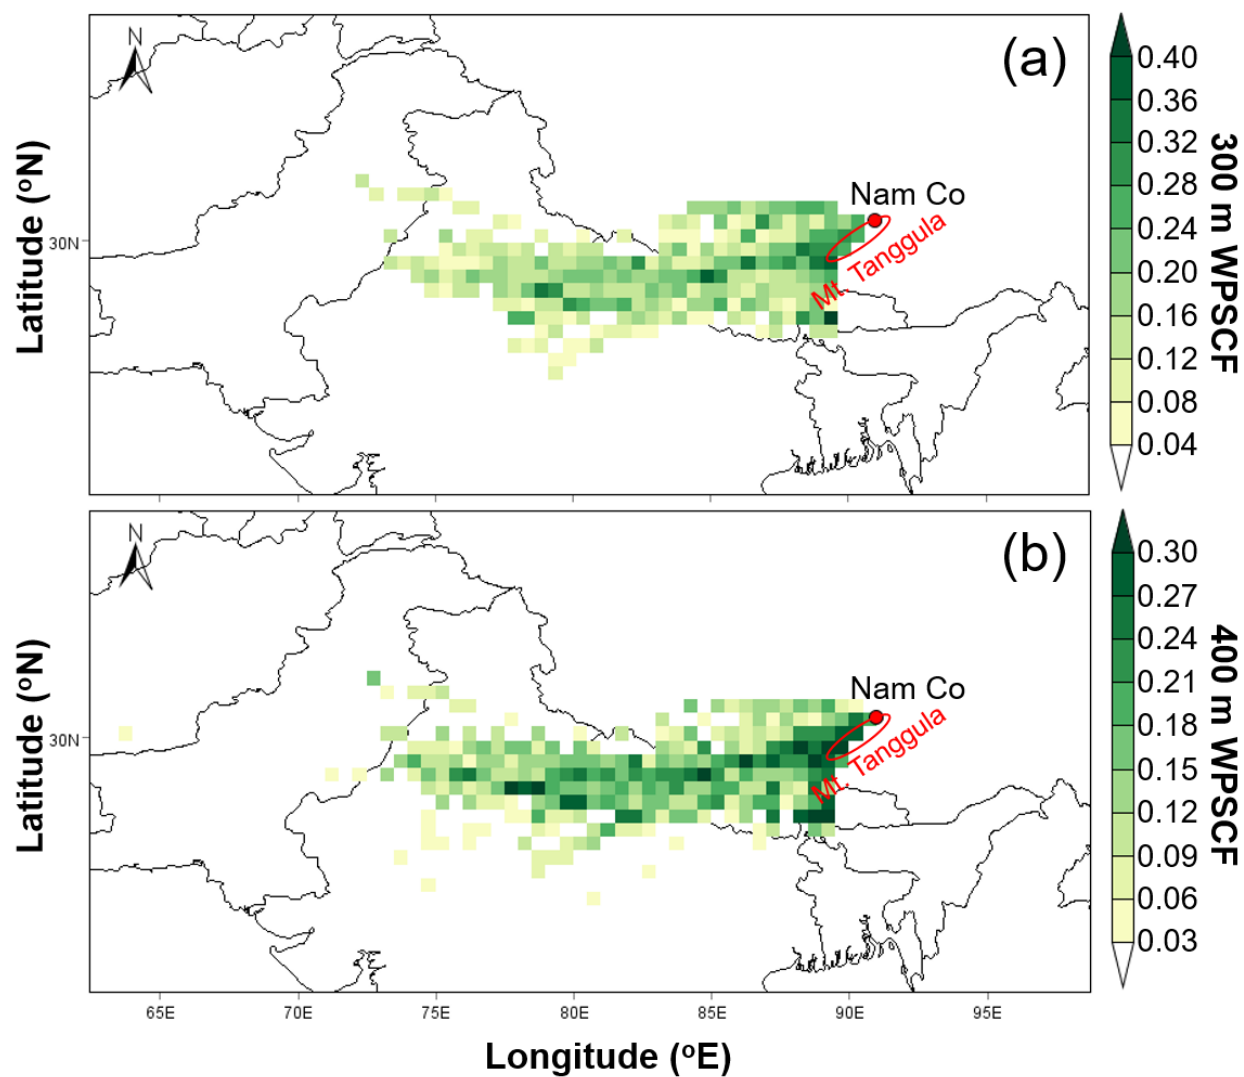

34  
 35  
 36  
 37

Figure S3. Spatial distributions of 24-h WPSCF values for NO<sub>2</sub> at (a) 300 m, and (b) 400 m height layers from 01 May to 09 July 2019 over CAS (NAMORS).

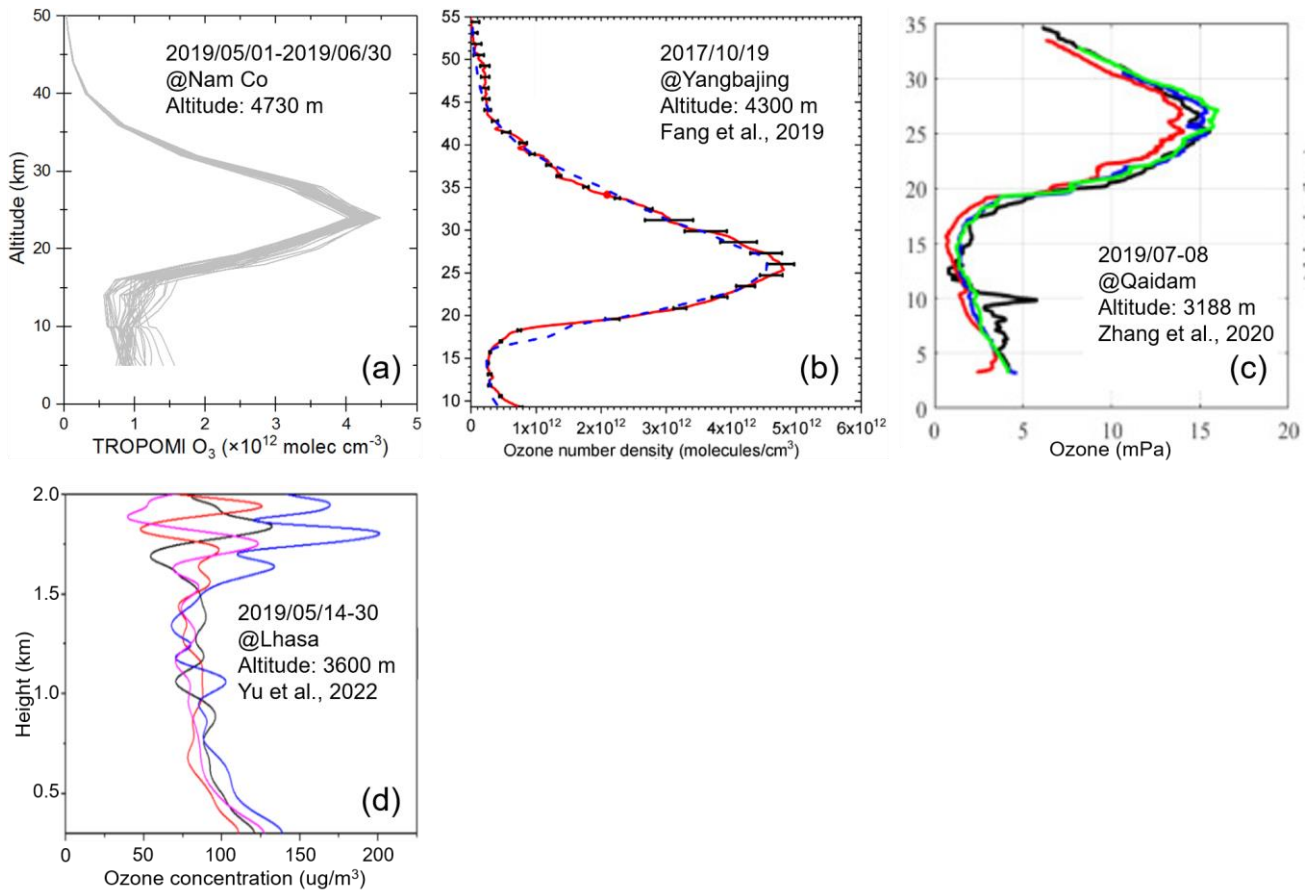

38

39 Figure S4. Ozone vertical profile measure by (a) TROPOMI at Nam Co, (b) lidar at Yangbajing (Feng  
 40 et al., 2019), (c) ozonesonde at Qaidam (Zhang et al., 2020), and (d) lidar at Lhasa (Yu et al., 2022).

41

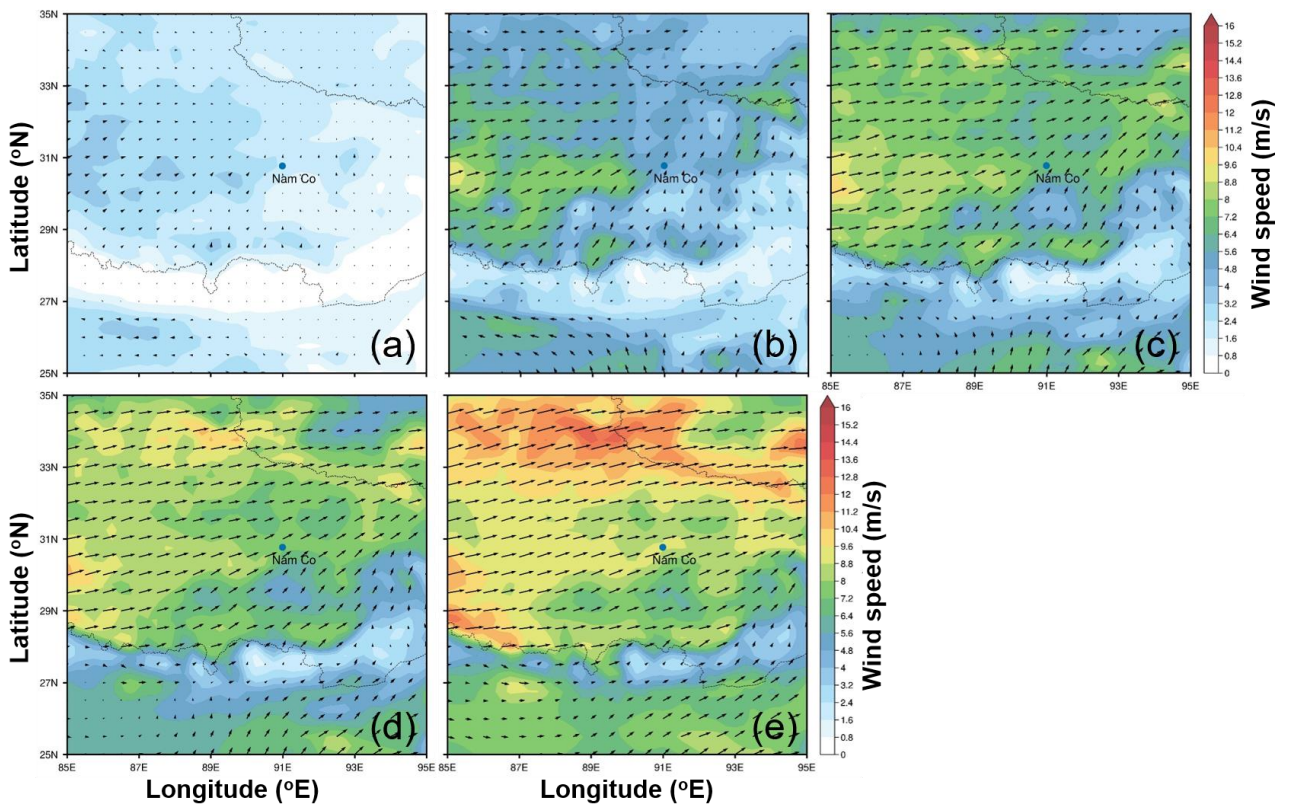

42

43

Figure S5. Wind direction and wind speed at (a) 10 m, (b) 500 m, (c) 1000 m, (d) 1300 m, and (e) 1800 m at a range of 25°N-35°N and 85°E-95°E, respectively.

44

45

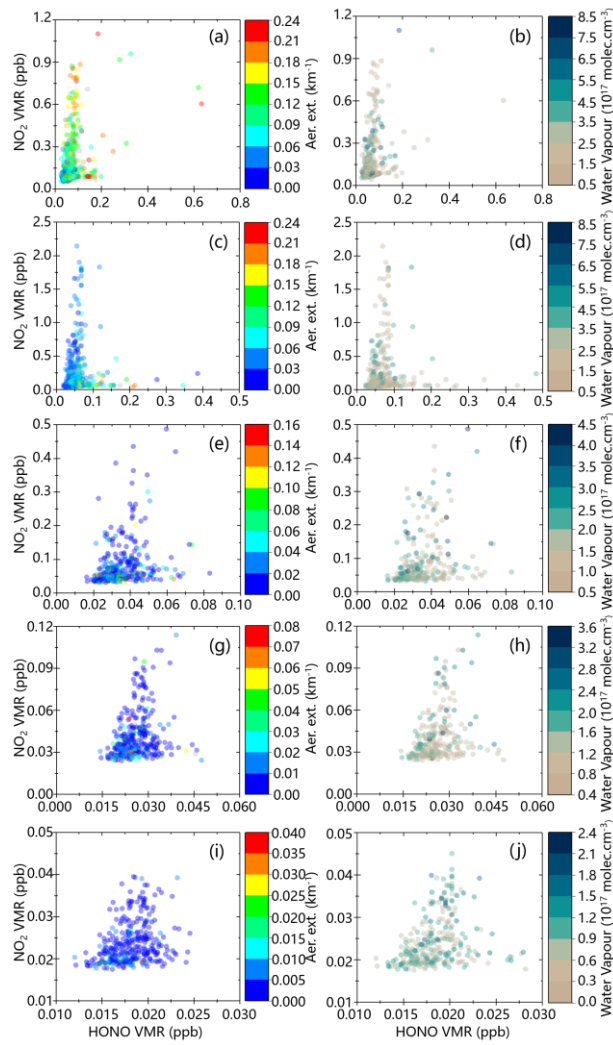

46

47 Figure S6. Scatter plots of HONO vs NO<sub>2</sub> at (a-b) 0-0.2 km, (c-d) 0.4-0.6 km, (e-f) 0.8-1.0 km, (g-h)  
 48 1.2-1.4 km, and (i-j) 1.6-1.8 km coloured by aerosol extinction coefficients and water vapour in the top  
 49 and bottom row, respectively, from 01 May to 09 July 2019.

50

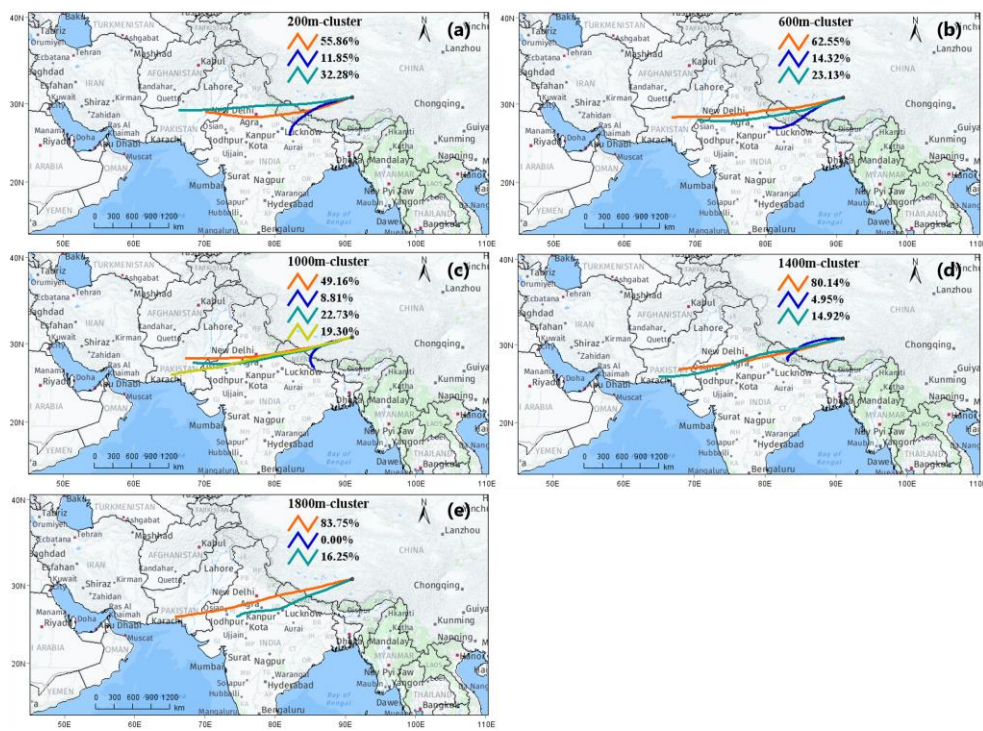

51

52 Figure S7. The percentage of allocation to each mean 48-h backward trajectory cluster arriving at CAS  
 53 (NAMORS) at (a) 200 m, (b) 600 m, (c) 1000 m, (d) 1400 m, and (e) 1800 m height layers from 01  
 54 May to 09 July 2019.

55



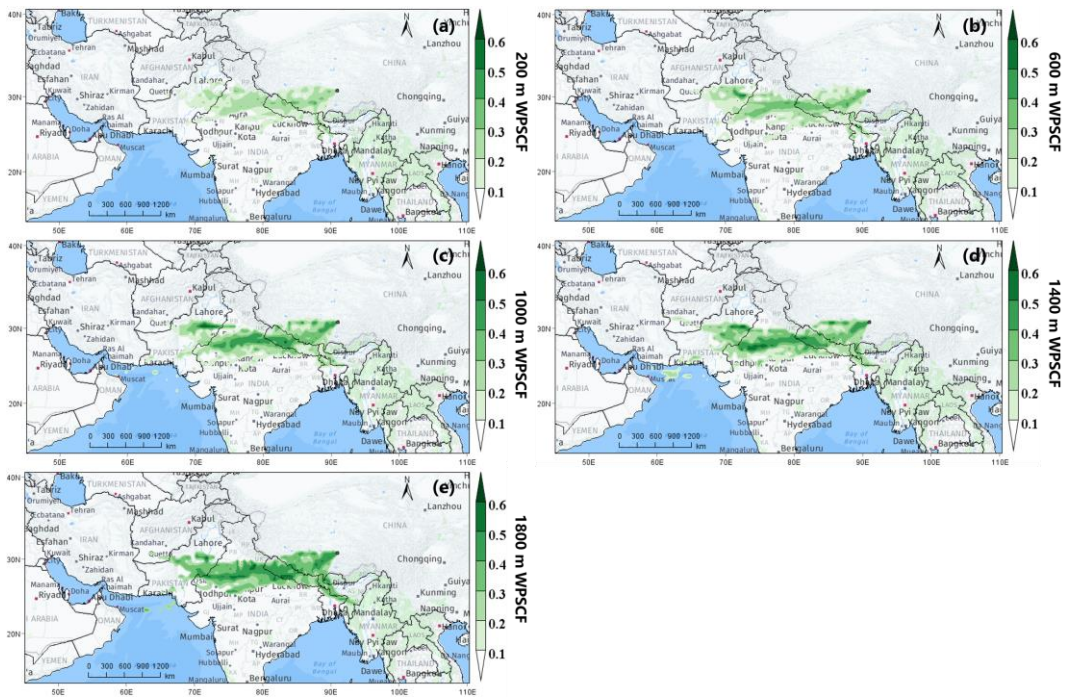

56

57 Figure S8. Spatial distributions of 48-hr WSPSCF values for O<sub>3</sub> at (a) 200 m, (b) 600 m, (c) 1000 m, (d)  
 58 1400 m, and (e) 1800 m height layers from 01 May to 09 July 2019 over CAS (NAMORS).

59

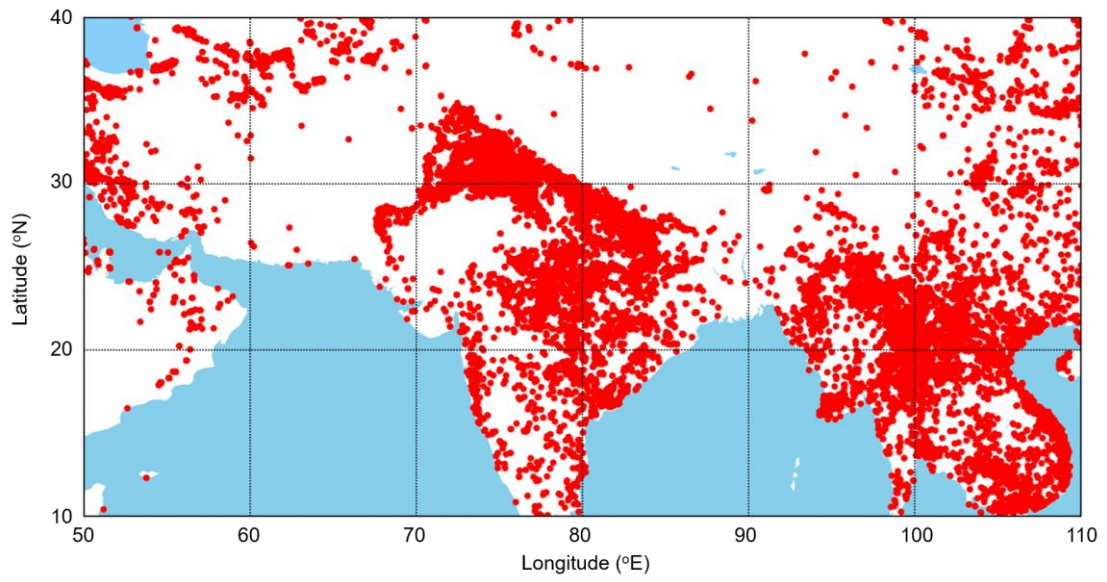

60  
61  
62

Figure S9. The spatial distribution of fire point in south Asian subcontinent from May to July 2019.

63 Appendix: WRF model configurations

64 The Weather Research and Forecasting (WRF) model was used to simulate the planetary boundary layer (PBL) height  
65 on the Tibetan Plateau. The detailed description of WRF model was given in the WRF website  
66 (<http://www.wrf-model.org/index.php>). In this work, the simulation domain covered 25°N-35°N and 80°E-100°E. The  
67 horizontal resolution of this simulation was set to 20×20 km<sup>2</sup>, and we set 26 hybrid pressure-sigma levels in the  
68 vertical direction. We selected the 6-h final operational global analysis (FNL) data as the initial meteorological fields  
69 and boundary conditions. The data were provided by the National Centers for Environmental Prediction (NCEP) with  
70 a 1° × 1° spatial resolution. Moreover, the NCEP Administrative Data Processing (ADP) Global Surface  
71 Observational Weather Data (ds461.0) and Upper Air Observational Weather Data (ds351.0) with 6-h temporal  
72 resolution were used to accurately reproduce the methodology. The physical parameterization schemes adopted in this  
73 study were described in Table S1.

74 Table S1. Model physical parameterization schemes.

---

| Schemes                  | Description                                           |
|--------------------------|-------------------------------------------------------|
| Microphysics             | Purdue Lin Scheme (Chen et al., 2002)                 |
| Longwave radiation       | Rapid radiative RRTMG Scheme (Iacono et al., 2008)    |
| Shortwave radiation      | RRTMG Scheme (Iacono et al., 2008)                    |
| Cumulus parameterization | Grell-Freitas Ensemble Scheme (Grell et al., 2014)    |
| Land surface             | Unified Noah Land Surface Model (Tewari et al., 2004) |
| Planetary boundary layer | Yonsei University Scheme (Hong et al., 2006)          |

---

75  
76

---

77 **References**

- 78 [1] Fang, X., Li, T., Ban, C., Wu, Z., Li, J., Li, F., Cen, Y., and Tian, B.: A mobile differential  
79 absorption lidar for simultaneous observations of tropospheric and stratospheric ozone over Tibet, *Opt.*  
80 *Express*, 2019, 27(4), 4126-4139, doi:10.1364/OE.27.004126.
- 81 [2] Yu, J., Meng, L., Chen, Y., Zhang, H., and Liu, J.: Ozone profiles, precursors, and vertical  
82 distribution in urban Lhasa, Tibetan Plateau, *Remote Sens.*, 2022, 14(11), doi:10.3390/rs14112533.
- 83 [3] Zhang, J., Xia, X., and Wu, X.: First in situ UV profile across the UTLS accompanied by ozone  
84 measurement over the Tibetan Plateau, *J. Environ. Sci.*, 2020, 98, 71-76, doi:10.1016/j.jes.2020.05.020.
